# Supplementary material for: Tight-binding investigation of the structural and vibrational properties of graphene–single wall carbon nanotube junctions
Source: Royal Society of Chemistry journal article supplement (doi:10.1039/d0na00881h), 2021-01-01
Supplement: d0na00881h1.pdf [file d0na00881h1.pdf]

## [Supplementary Information (SI)]

# Tight-binding investigation of structural and vibrational properties of graphene-single wall carbon nanotube junctions

Juhi Srivastava,<sup>a,b</sup> and Anshu Gaur<sup>a,b\*</sup>

### S.1 Structural specifications and deformation behavior

| (a)<br>Hybrid | No. of Atoms |     |        | (b)              |                   |                   |                     |
|---------------|--------------|-----|--------|------------------|-------------------|-------------------|---------------------|
|               | SWNT         | SLG | Hybrid | Diameter [D (Å)] | $\Delta[D_x]$ (Å) | $\Delta[D_y]$ (Å) | Dip in Graphene (Å) |
| Gr-CNT(8,0)   | 32           | 64  | 96     | 6.446            | 0.066             | -0.080            | 0.763               |
| Gr-CNT(5,5)   | 20           | 36  | 56     | 6.946            | 0.074             | -0.079            | 0.813               |
| Gr-CNT(9,0)   | 36           | 60  | 96     | 7.224            | 0.095             | -0.108            | 0.823               |
| Gr-CNT(10,0)  | 40           | 64  | 104    | 8.003            | 0.129             | -0.161            | 0.931               |
| Gr-CNT(6,6)   | 24           | 36  | 60     | 8.304            | 0.142             | -0.169            | 0.924               |
| Gr-CNT(7,7)   | 28           | 40  | 68     | 9.639            | 0.172             | -0.322            | 1.099               |
| Gr-CNT(13,0)  | 52           | 64  | 116    | 10.362           | 0.297             | -0.360            | 1.095               |
| Gr-CNT(8,8)   | 32           | 40  | 72     | 11.030           | 0.369             | -0.463            | 1.197               |
| Gr-CNT(9,9)   | 36           | 44  | 80     | 12.397           | 0.555             | -0.721            | 1.370               |
| Gr-CNT(16,0)  | 64           | 64  | 128    | 12.728           | 0.594             | -0.766            | 1.311               |
| Gr-CNT(10,10) | 40           | 48  | 88     | 13.765           | 0.809             | -1.043            | 1.557               |
| Gr-CNT(11,11) | 44           | 48  | 92     | 15.134           | 1.100             | -1.462            | 1.645               |

**Table 1 (a)** The numbers of atoms in individual SWNT and SLG and in their hybrid structures for various hetero-structures studies in this work; **(b)** Structural deformations in components (SWNT and SLG) after geometrical relaxation of the hybrid structures, shown as the variation in horizontal ( $\Delta D_x$ ) and vertical ( $\Delta D_y$ ) tube diameters and the change in y-level of graphene at the point of closest proximity between SWNT and SLG (dip). The data is sorted according to increasing diameter.

### S.2 Calculation Method

Tight binding DFT methods are most suitable when dealing with large number of atoms in a system. Unlike DFT which uses a plane-wave basis set and pseudopotentials based on different approximations to replace the true wave-function of the many electron system with a smooth wave-function with no radial nodes in the core, DFTB method is based on the parameterization of pairwise atomic interactions (incorporated in Slater-Koster (S-K) files)<sup>1</sup>. These files include tabulated Hamiltonian, overlap matrix elements, and the repulsive potentials which are added to compute the total energies by fitting to reproduce the DFT total energy. Various S-K parameters have previously been tested for organic<sup>1</sup> and inorganic<sup>2</sup> based compounds for structural and electronic properties. While few authors have investigated the accuracy of this method for the calculation of vibrational frequencies<sup>1,3-5</sup>, T. A. Niehaus *et al.*<sup>6</sup> has benchmarked this method and various Slater-Koster parameter sets for the calculations of phonon dispersion and also compared the results obtained with the available DFT results.

<sup>a</sup> Department of Materials Science and Engineering, Indian Institute of Technology Kanpur, Kanpur 208016, Uttar Pradesh, India.

<sup>b</sup> Samtel Centre for Display Technologies, Indian Institute of Technology Kanpur, Kanpur 208016, Uttar Pradesh, India.

\* The corresponding author; E-mail: agaur@iitk.ac.in

### S.3 Phonon frequencies in hybrid nanostructures

| Hybrids              | Modes  | Phonon frquencies (cm <sup>-1</sup> ) |                      |                    |                        | Total Frequency shift (cm <sup>-1</sup> ) |        |        |
|----------------------|--------|---------------------------------------|----------------------|--------------------|------------------------|-------------------------------------------|--------|--------|
|                      |        | Pristine (P)                          | Unrelaxed hybrids(U) | Relaxed hybrids(R) | Deformed components(D) | U-P                                       | R-P    | D-P    |
| <b>GR-CNT(5,5)</b>   |        |                                       |                      |                    |                        |                                           |        |        |
|                      | RBM    | 341.43                                | 344.46               | 344.05             | 341.48                 | 3.03                                      | 2.61   | 0.05   |
|                      | LO-CNT | 1564.97                               | 1564.9               | 1564.88            | 1564.87                | -0.07                                     | -0.1   | -0.1   |
|                      | TO-CNT | 1588.27                               | 1588.15              | 1587.31            | 1587.49                | -0.13                                     | -0.96  | -0.78  |
|                      | TO-Gr  | 1588.14                               | 1588.09              | 1585.28            | 1585.32                | -0.05                                     | -2.87  | -2.82  |
|                      | LO-Gr  | 1621.28                               | 1621.18              | 1616.64            | 1616.75                | -0.1                                      | -4.63  | -4.53  |
| <b>GR-CNT(6,6)</b>   |        |                                       |                      |                    |                        |                                           |        |        |
|                      | RBM    | 285.01                                | 288.28               | 288.06             | 285.10                 | 3.27                                      | 3.04   | 0.08   |
|                      | LO-CNT | 1573.7                                | 1573.65              | 1573.57            | 1573.65                | -0.05                                     | -0.14  | -0.06  |
|                      | TO-CNT | 1597.27                               | 1597.16              | 1596.83            | 1596.96                | -0.11                                     | -0.44  | -0.31  |
|                      | TO-Gr  | 1588.51                               | 1588.45              | 1584.71            | 1584.77                | -0.06                                     | -3.8   | -3.74  |
|                      | LO-Gr  | 1621.51                               | 1621.42              | 1615.42            | 1615.53                | -0.09                                     | -6.09  | -5.97  |
| <b>GR-CNT(7,7)</b>   |        |                                       |                      |                    |                        |                                           |        |        |
|                      | RBM    | 244.53                                | 248.24               | 247.93             | 244.68                 | 3.7                                       | 3.39   | 0.14   |
|                      | LO-CNT | 1578.56                               | 1578.5               | 1578.41            | 1578.5                 | -0.06                                     | -0.15  | -0.06  |
|                      | TO-CNT | 1603.26                               | 1603.16              | 1602.46            | 1602.67                | -0.1                                      | -0.8   | -0.59  |
|                      | TO-Gr  | 1588.9                                | 1588.85              | 1584.28            | 1584.31                | -0.05                                     | -4.62  | -4.59  |
|                      | LO-Gr  | 1621.57                               | 1621.5               | 1614.15            | 1614.3                 | -0.07                                     | -7.42  | -7.27  |
| <b>GR-CNT(8,8)</b>   |        |                                       |                      |                    |                        |                                           |        |        |
|                      | RBM    | 214.08                                | 215.79               | 217.66             | 214.11                 | 1.71                                      | 3.58   | 0.03   |
|                      | LO-CNT | 1581.48                               | 1581.42              | 1581.35            | 1581.39                | -0.06                                     | -0.13  | -0.09  |
|                      | TO-CNT | 1607.48                               | 1607.41              | 1606.68            | 1606.84                | -0.08                                     | -0.8   | -0.64  |
|                      | TO-Gr  | 1589.11                               | 1589.06              | 1583.44            | 1583.44                | -0.04                                     | -5.67  | -5.67  |
|                      | LO-Gr  | 1621.7                                | 1621.76              | 1612.79            | 1612.71                | 0.05                                      | -8.91  | -8.99  |
| <b>GR-CNT(9,9)</b>   |        |                                       |                      |                    |                        |                                           |        |        |
|                      | RBM    | 190.36                                | 195.05               | 195.89             | 191.24                 | 4.69                                      | 5.52   | 0.88   |
|                      | LO-CNT | 1583.35                               | 1583.3               | 1583.3             | 1583.23                | -0.05                                     | -0.05  | -0.12  |
|                      | TO-CNT | 1610.55                               | 1610.46              | 1609.4             | 1609.68                | -0.08                                     | -1.15  | -0.87  |
|                      | TO-Gr  | 1589.3                                | 1589.27              | 1582.53            | 1582.57                | -0.03                                     | -6.77  | -6.73  |
|                      | LO-Gr  | 1621.78                               | 1621.7               | 1610.8             | 1611.02                | -0.08                                     | -10.98 | -10.76 |
| <b>GR-CNT(10,10)</b> |        |                                       |                      |                    |                        |                                           |        |        |
|                      | RBM    | 171.37                                | 179.05               | 176.83             | 172.39                 | 7.67                                      | 5.45   | 1.02   |
|                      | LO-CNT | 1584.64                               | 1584.58              | 1584.52            | 1584.46                | -0.06                                     | -0.12  | -0.18  |
|                      | TO-CNT | 1612.81                               | 1612.73              | 1611.51            | 1611.61                | -0.08                                     | -1.3   | -1.2   |
|                      | TO-Gr  | 1589.43                               | 1589.39              | 1581.77            | 1581.62                | -0.03                                     | -7.65  | -7.81  |
|                      | LO-Gr  | 1621.86                               | 1621.77              | 1609.31            | 1609.31                | -0.09                                     | -12.55 | -12.55 |
| <b>GR-CNT(11,11)</b> |        |                                       |                      |                    |                        |                                           |        |        |
|                      | RBM    | 155.82                                | 155.80               | 161.91             | 157.12                 | -0.02                                     | 6.09   | 1.3    |
|                      | LO-CNT | 1585.58                               | 1585.51              | 1585.43            | 1585.36                | -0.07                                     | -0.15  | -0.22  |
|                      | TO-CNT | 1614.5                                | 1614.4               | 1612.86            | 1613.12                | -0.1                                      | -1.64  | -1.38  |
|                      | TO-Gr  | 1589.52                               | 1589.49              | 1580.71            | 1580.72                | -0.03                                     | -8.81  | -8.80  |
|                      | LO-Gr  | 1621.92                               | 1621.85              | 1607.41            | 1607.7                 | -0.07                                     | -14.51 | -14.22 |

| Hybrids             | Modes  | Phonon frequencies (cm <sup>-1</sup> ) |                      |                    |                        | Total Frequency shift (cm <sup>-1</sup> ) |        |        |
|---------------------|--------|----------------------------------------|----------------------|--------------------|------------------------|-------------------------------------------|--------|--------|
|                     |        | Pristine (P)                           | Unrelaxed hybrids(U) | Relaxed hybrids(R) | Deformed components(D) | U-P                                       | R-P    | D-P    |
| <b>GR-CNT(8,0)</b>  |        |                                        |                      |                    |                        |                                           |        |        |
|                     | RBM    | 362.32                                 | 364.07               | 364.86             | 362.33                 | 1.75                                      | 2.54   | 0      |
|                     | LO-CNT | 1595.1                                 | 1594.42              | 1594.14            | 1594.98                | -0.68                                     | -0.96  | -0.12  |
|                     | TO-CNT | 1499.27                                | 1499.15              | 1498.69            | 1498.75                | -0.12                                     | -0.58  | -0.52  |
|                     | TO-Gr  | 1502.81                                | 1503.05              | 1497.78            | 1497.59                | 0.24                                      | -5.03  | -5.21  |
|                     | LO-Gr  | 1632.25                                | 1631.93              | 1629.41            | 1629.79                | -0.33                                     | -2.85  | -2.47  |
| <b>GR-CNT(10,0)</b> |        |                                        |                      |                    |                        |                                           |        |        |
|                     | RBM    | 293.14                                 | 295.86               | 295.87             | 293.2                  | 2.72                                      | 2.72   | 0.06   |
|                     | LO-CNT | 1611.37                                | 1610.29              | 1610.01            | 1611.26                | -1.08                                     | -1.36  | -0.11  |
|                     | TO-CNT | 1501.05                                | 1502.1               | 1501.91            | 1500.78                | 1.05                                      | 0.87   | -0.27  |
|                     | TO-Gr  | 1502.7                                 | 1503.21              | 1496.01            | 1495.51                | 0.52                                      | -6.68  | -7.18  |
|                     | LO-Gr  | 1630.56                                | 1629.91              | 1626.41            | 1627.14                | -0.65                                     | -4.15  | -3.42  |
| <b>GR-CNT(13,0)</b> |        |                                        |                      |                    |                        |                                           |        |        |
|                     | RBM    | 226.92                                 | 229.71               | 230.17             | 226.92                 | 2.79                                      | 3.24   | -0.01  |
|                     | LO-CNT | 1618.81                                | 1617.52              | 1617.21            | 1618.67                | -1.3                                      | -1.6   | -0.15  |
|                     | TO-CNT | 1499.4                                 | 1500.9               | 1500.89            | 1499.12                | 1.5                                       | 1.49   | -0.28  |
|                     | TO-Gr  | 1502.7                                 | 1503.5               | 1492.9             | 1492.08                | 0.81                                      | -9.80  | -10.61 |
|                     | LO-Gr  | 1630.54                                | 1629.63              | 1624.51            | 1625.56                | -0.91                                     | -6.03  | -4.98  |
| <b>GR-CNT(16,0)</b> |        |                                        |                      |                    |                        |                                           |        |        |
|                     | RBM    | 184.96                                 | 188.78               | 191.12             | 185.75                 | 3.81                                      | 6.16   | 0.79   |
|                     | LO-CNT | 1622.71                                | 1621.94              | 1620.1             | 1622.48                | -0.77                                     | -2.61  | -0.23  |
|                     | TO-CNT | 1493.33                                | 1494.42              | 1495.71            | 1492.92                | 1.09                                      | 2.38   | -0.41  |
|                     | TO-Gr  | 1502.7                                 | 1503.31              | 1489.35            | 1488.15                | 0.62                                      | -13.35 | -14.55 |
|                     | LO-Gr  | 1630.59                                | 1629.85              | 1622.83            | 1623.77                | -0.74                                     | -7.76  | -6.82  |

**Table 2** The phonon frequencies of pristine components, unrelaxed and relaxed hybrid nanostructures and deformed components for various SWNT-SLG systems:

## S.4 Variation in phonon frequencies of pristine SWNT and SLG with charge

The variation in vibrational frequencies of individual SWNT and SLG are studied separately by introducing charges of both kinds (electrons and holes) and the results obtained are plotted in figure 1. Figure 1(a) and 1(c) show the variation in RBM, LO and TO mode frequencies of CNT(8,8) and CNT(16,0) with varying charges. The variation (asymmetric upshift with respect to electrons and holes) in RBM with introduced charges are insignificant in comparison to the LO and TO modes. In both semiconducting and metallic SWNTs, the G<sup>-</sup> mode is affected more with the introduced charges than the G<sup>+</sup> mode<sup>7-9</sup>. It should be noted that the G<sup>-</sup> vibrations corresponds to the LO mode vibrations in metallic tubes and TO mode vibrations in semiconducting tubes<sup>10</sup>. In armchair tubes and armchair-graphene chain, the vibrational frequencies of the LO and TO modes both blue-shift for the introduction of charges (both positive and negative) with the G<sup>-</sup> mode frequencies having higher shift rates (table 3), as previously reported in literature<sup>7,8,11-13</sup>. The shift in TO mode (G<sup>+</sup>) of armchair-tubes is very small in comparison to the LO mode (G<sup>-</sup>) and asymmetric for the introduction of electrons and holes. For the frequency shift rates in zigzag-tubes and zigzag graphene chain, the G<sup>-</sup> mode (TO mode) shows a higher shift rate with charge introduction, but the G<sup>+</sup> mode (LO mode) shows insignificant down-shift in comparison to the G<sup>-</sup> mode (as shown in table 3).

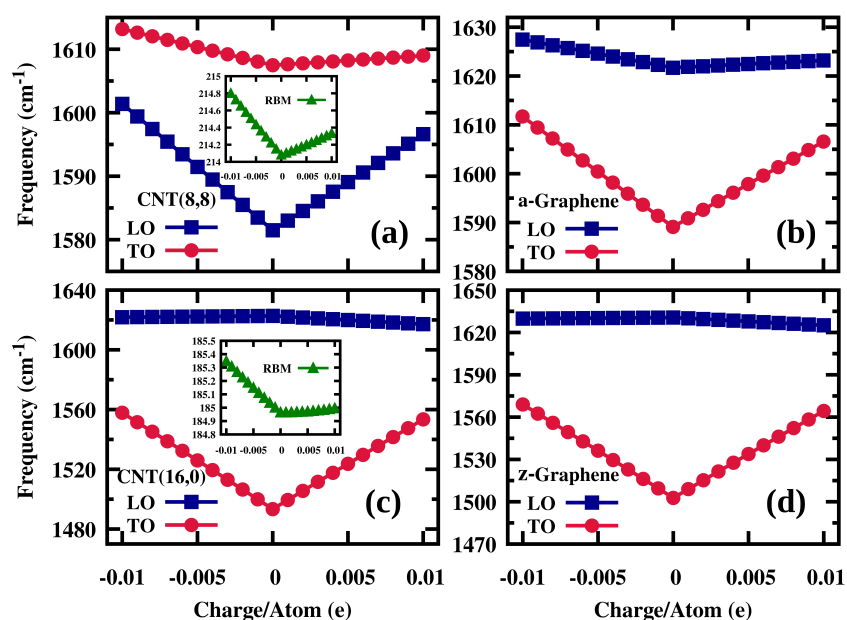

**Fig. 1** Change in Raman active vibrational frequencies with varying charge in (a) CNT(8,8); (b) armchair graphene chain (with 40 atoms); (c) CNT(16,0); (d) zigzag-graphene chain (with 64 atoms). Negative charges indicate excess of electrons and positive charges indicate excess of holes.

| Hybrid System | Phonon modes | In pristine components                               |                                                       | In hybrid system                               |                  |
|---------------|--------------|------------------------------------------------------|-------------------------------------------------------|------------------------------------------------|------------------|
|               |              | Charge/atom required per $\text{cm}^{-1}$ change (e) | Total charge required per $\text{cm}^{-1}$ change (e) | Total charge transferred at vdW separation (e) |                  |
| GR-CNT(8,8)   |              |                                                      |                                                       |                                                |                  |
| CNT88         | RBM          | -0.0139                                              | -0.4451                                               | Relaxed hybrid                                 | Unrelaxed hybrid |
|               | TO           | -0.0018                                              | -0.0561                                               |                                                |                  |
|               | LO           | -0.0005                                              | -0.0161                                               |                                                |                  |
| Graphene      | TO           | 0.0006                                               | 0.0229                                                | 0.0031                                         | 0.0018           |
|               | LO           | 0.0067                                               | 0.2665                                                |                                                |                  |
| GR-CNT(16,0)  |              |                                                      |                                                       |                                                |                  |
| CNT160        | RBM          | -0.0261                                              | -1.6710                                               | Relaxed hybrid                                 | Unrelaxed hybrid |
|               | TO           | -0.0002                                              | -0.0099                                               |                                                |                  |
|               | LO           | 0.0112                                               | 0.7191                                                |                                                |                  |
| Graphene      | TO           | 0.0002                                               | 0.0104                                                | 0.0065                                         | 0.0034           |
|               | LO           | -0.0018                                              | -0.1162                                               |                                                |                  |

**Table 3** Frequency shift rates with charge for pristine components of GR-CNT(8,8) and GR-CNT(16,0) hybrids and the total charge transferred at vdW separation within the hybrid systems.

## References

- 1 M. Gaus, A. Goez and M. Elstner, *Journal of Chemical Theory and Computation*, 2013, **9**, 338–354.
- 2 M. Wahiduzzaman, A. F. Oliveira, P. Philippsen, L. Zhechkov, E. van Lenthe, H. A. Witek and T. Heine, *Journal of Chemical Theory and Computation*, 2013, **9**, 4006–4017.
- 3 T. Krüger, M. Elstner, P. Schiffels and T. Frauenheim, *The Journal of Chemical Physics*, 2005, **122**, 114110.
- 4 M. Elstner, *PhD dissertation*, University of Paderborn, Paderborn, Germany, 1998.
- 5 V. S. S. Inakollu and H. Yu, *Journal of Computational Chemistry*, 2018, **39**, 2067–2078.

- 6 T. A. Niehaus, S. T. A. G. Melissen, B. Aradi and S. M. V. Allaei, *Journal of Physics: Condensed Matter*, 2019, **31**, 395901.
- 7 A. Das, A. K. Sood, A. Govindaraj, A. M. Saitta, M. Lazzeri, F. Mauri and C. N. R. Rao, *Phys. Rev. Lett.*, 2007, **99**, 136803.
- 8 H. Farhat, H. Son, G. G. Samsonidze, S. Reich, M. S. Dresselhaus and J. Kong, *Phys. Rev. Lett.*, 2007, **99**, 145506.
- 9 A. Das and A. K. Sood, *Phys. Rev. B*, 2009, **79**, 235429.
- 10 M. Fouquet, H. Telg, J. Maultzsch, Y. Wu, B. Chandra, J. Hone, T. F. Heinz and C. Thomsen, *Phys. Rev. Lett.*, 2009, **102**, 075501.
- 11 A. Das, S. Pisana, B. Chakraborty, S. Piscanec, S. Saha, U. Waghmare, K. Novoselov, H. Krishnamurthy, A. Geim, A. Ferrari and A. Sood, *Nature nanotechnology*, 2008, **3**, 210–5.
- 12 K. T. Nguyen, A. Gaur and M. Shim, *Phys. Rev. Lett.*, 2007, **98**, 145504.
- 13 H. Farhat, K. Sasaki, M. Kalbac, M. Hofmann, R. Saito, M. S. Dresselhaus and J. Kong, *Phys. Rev. Lett.*, 2009, **102**, 126804.
